# Supplementary material
Source: PubMed Central journal article supplement (PMC3675961)
Supplement: CVI.00734-12_zcd999094756so2.pdf [file CVI.00734-12_zcd999094756so2.pdf]

## Supplementary Methods

### 1 Chernoff bound to define prevalence at the sequencing depth employed by this study

Assume that event  $e$  occurs with probability  $p$  and further assume that there are  $n$  trials. Then, the expected number of occurrences of  $e$  is:

$$\mu = \mathbb{E} \left[ \sum_{i=1}^n p \right] = np. \quad (1)$$

Given that the  $n$  trials are independent, Chernoff bound [1] applied to our setting tells us the following:

**Theorem 1** *Given  $n$  independent trials, where in each trial event  $e$  occurs with probability  $p$ , then for  $0 < \epsilon \leq 1$ , the the probability of seeing  $X$  occurrences of  $e$  as a function of  $\epsilon$  and  $\mu$  (given in Equation (1)) is bounded as follows:*

$$\Pr[X < (1 - \epsilon)\mu] < e^{-\mu\epsilon^2/2}. \quad (2)$$

Given that we need to evaluate the probability of obtaining at least one sample of  $e$  with 95% confidence, we are interested in computing the value of the parameter  $\mu$  (and thus also  $p$ ) for which  $\Pr[X < 1] < 0.05$ . Thus, setting in Equation (2),  $(1 - \epsilon)\mu = 1$  we get that

$$\epsilon = \frac{\mu - 1}{\mu}.$$

Also, since we want  $\Pr[X < 1]$  to be bounded by 0.05, we get that

$$e^{-\mu\epsilon^2/2} \leq 0.05 \quad (3)$$

$$-\mu\epsilon^2/2 \leq \log(0.05) \quad (4)$$

$$\mu^2 + (2 \log(0.05) - 2)\mu + 1 \geq 0. \quad (5)$$

Solving the above inequality for  $\mu$  (and after doing the necessary roundings) we get:

$$\mu \leq 0.1272$$

and

$$\mu \geq 7.86.$$

Clearly, for values of  $\mu \leq 0.1272$ , the value of  $\epsilon = \frac{\mu-1}{\mu}$  is negative and thus these values of  $\mu$  can be ignored. Thus, we conclude that as long as  $\mu \geq 7.86$  we get at least one sample of  $e$  in our trials. If we want to compute the smallest value of  $p$  for which this is possible we get by Equation (1) that

$$pn \geq 7.86$$

or

$$p \geq \frac{7.86}{n}.$$

Plugging in  $n = 1709$  we get that for  $p > 0.0052$  we are 95% confident that we will see at least one sample of  $e$ .

## References

- [1] R. Motwani and P. Raghavan. *Randomized Algorithms*. Cambridge University Press, 1995.
